# Supplementary material for: PhoU2 but Not PhoU1 as an Important Regulator of Biofilm Formation and Tolerance to Multiple Stresses by Participating in Various Fundamental Metabolic Processes in Staphylococcus epidermidis
Source: PubMed Central journal article supplement (PMC5686610; doi:10.1128/jb.00219-17), 2017-11-14
Supplement: JB.00219-17_zjb024174594s6.pdf [file JB.00219-17_zjb024174594s6.pdf]

1 Supplemental Data

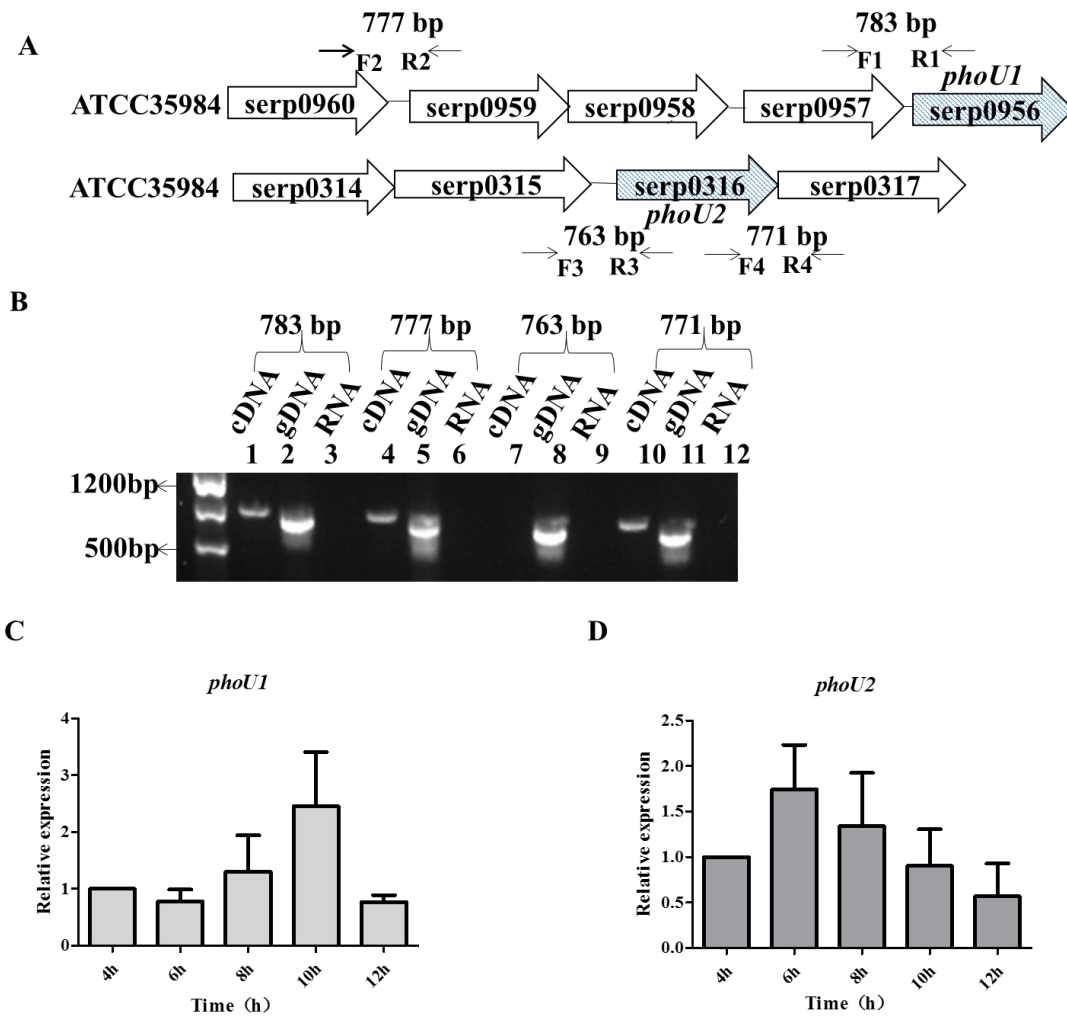

2  
 3 **Fig. S1** Identification and transcription level of *phoU* operons. (A) Sketch map of the  
 4 primers designed for the *phoU1* and *phoU2* co-transcription genes. (B) PCR product  
 5 electrophoresis banding using different primers and template. In Lanes 1, 2, and 3, F1  
 6 and R1 primers were used to identify the co-transcription of *serp0956* and *serp0957*.  
 7 cDNA was used as the template for PCR in Lane 1, genomic DNA in Lane 2 and RNA  
 8 in Lane 3. In Lanes 4, 5, and 6, primers of F2 and R2 were used to identify the co-  
 9 transcription of *serp0959* and *serp0960*. In Lanes 7, 8, and 9, the F3 and R3 primers  
 10 were used to identify the co-transcription of *serp0315* and *serp0316*. In Lanes 10, 11,  
 11 and 12, primers F3 and R3 were used to identify the co-transcription for *serp0316* and

12 *serp0317*. (C) The transcription level of *phoU1* at different time point. (D) The  
 13 transcription level of *phoU2* at different time point. Overnight cultures of  $\Delta$ *phoU1*,  
 14  $\Delta$ *phoU2* and SE1457 strains were diluted 1:200 into fresh TSB. Total RNA extracted  
 15 from SE1457,  $\Delta$ *phoU1* and  $\Delta$ *phoU2* was treated with the PrimeScript™ RT reagent kit  
 16 (Takara Biotechnology, Dalian, China) for DNA digestion and reverse-transcribed into  
 17 cDNA. Q-PCRs were performed using the Mastercycler realplex system (Eppendorf  
 18 AG, Hamburg, Germany) with SYBR green PCR reagents (Premix EX Taq™, Takara  
 19 Biotechnology, Dalian, China). The amplification conditions were 95°C for 30 s, 40  
 20 cycles of 95°C for 5 s, and 60°C for 34 s, followed by a melting curve analysis. *gyrB*  
 21 (DNA gyrase subunit B) was used as a housekeeping gene to normalize the transcription  
 22 levels of genes in the qPCR. All RT-qPCRs were performed in triplicate.

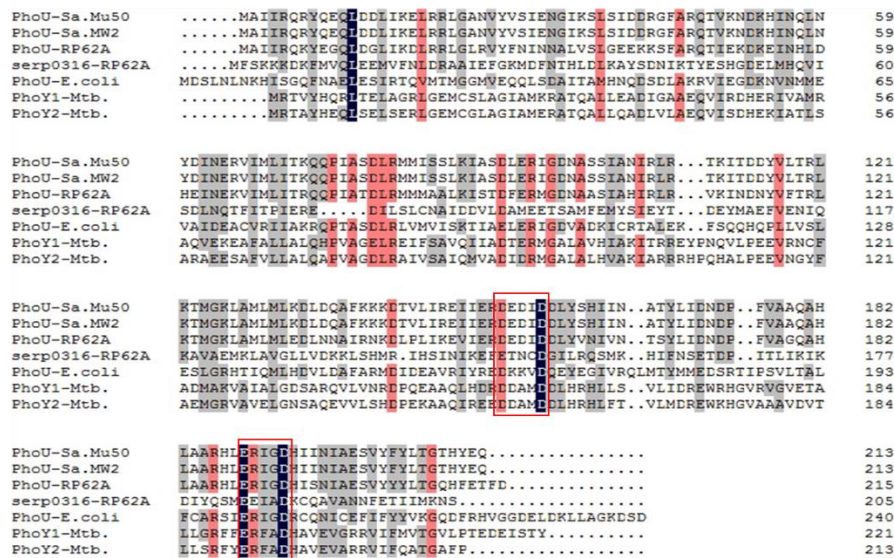

24 **Fig S2** The conserved motif [(E(D)XXXD)] in PhoU homologs. The amino acid  
 25 sequence was aligned using DNAMAN software. The amino acid sequences in the red  
 26 square had the conserved motif of PhoU in different bacterial species, in accordance  
 27 with the reported sequences in *Thermotoga maritima*.

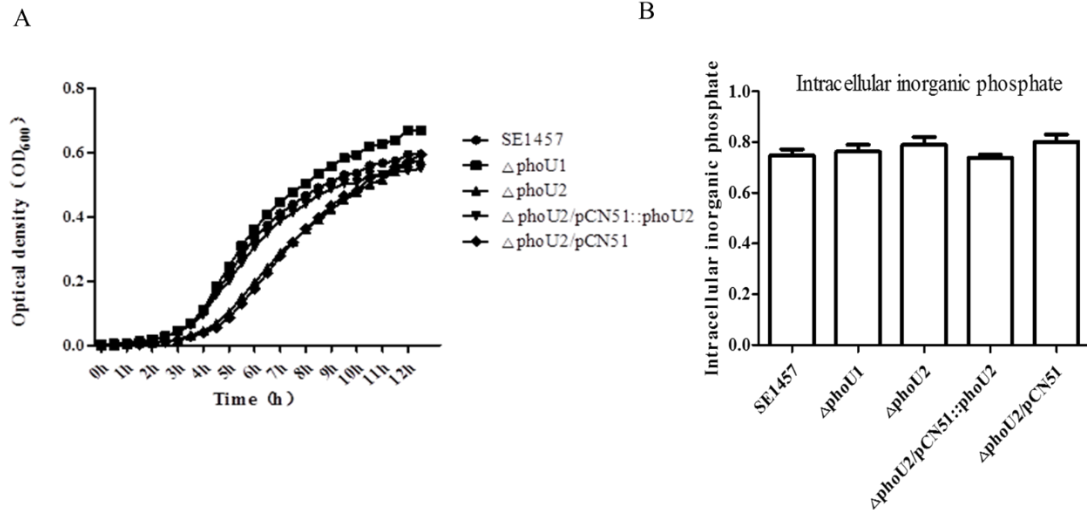

28

29 **Fig. S3** (A) Growth curves of  $\Delta phoU1$  and  $\Delta phoU2$  under Pi-limiting conditions.

30 Overnight cultures of  $\Delta phoU1$ ,  $\Delta phoU2$  and SE1457 strains were diluted 1:200 into 10

31 ml SSM9PR (without  $Na_2HPO_4$ ,  $KH_2PO_4$ ) in a conical flask in a volume of 100 ml and

32 incubated with shaking at 220 rpm. Bacterial growth was monitored by measuring the

33 OD<sub>600</sub> for 12 h. The Pi-limiting conditions was used a medium named SSM9PR which

34 containing 1xM9 salts (without  $Na_2HPO_4$ ,  $KH_2PO_4$ ), 2 mM  $MgSO_4$ , 0.1mM  $CaCl_2$ , 1%

35 glucose, 1% casaminoacids, 1 mM Thiamine-HCl and 0.05mM nicotinamide. (B)

36 Intracellular Pi of  $\Delta phoU1$  and  $\Delta phoU2$ . Overnight cultures of  $\Delta phoU1$ ,  $\Delta phoU2$  and

37 SE1457 strains were diluted 1:200 into 4 ml TSB. A commercially available kit system

38 (no. ab65622; Abcam) was used to quantify intracellular inorganic phosphate (Pi) levels.

39 Overnight cultures of  $\Delta phoU1$ ,  $\Delta phoU2$  and SE1457 strains were diluted 1:200 into 4

40 ml TSB. After 6 h, the cultures were chilled on ice for 15 min before cells were

41 harvested by centrifugation at 4,000 g for 10 min at 4°C. The pellet was washed twice

42 adjusted to an OD<sub>600</sub> of 1.0; 1 ml of that suspension was used for cell disruption for 30

43 s, in three rounds, with 0.5 ml of 0.1-mm glass zirconium/silica beads. Homogenized

44 samples were centrifuged at 15,000 g for 15 min at 4°C. The supernatant was diluted

45 1:200, and Pi levels were determined according to the manufacturer's instructions. The  
46 experiments were repeated three times, and the data represent means $\pm$ SD. P>0.05.

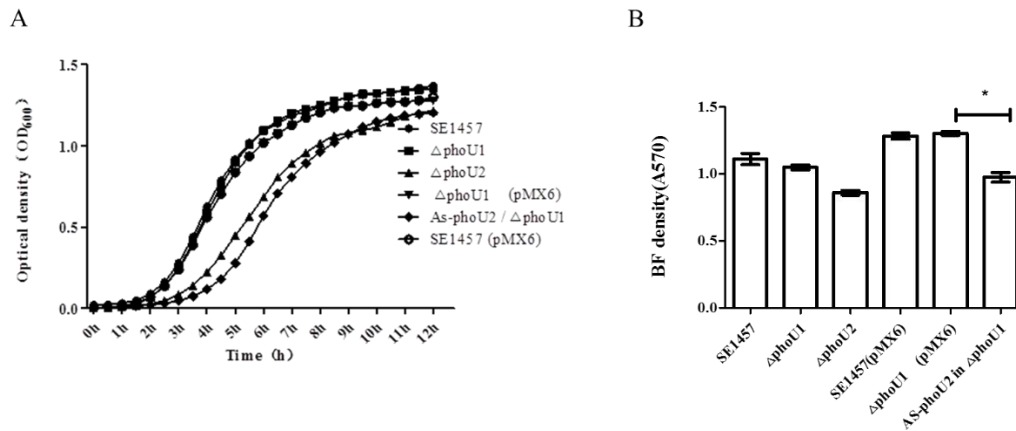

47  
48 **Fig. S4** (A) Growth curves of AS-*phoU2*/ $\Delta$ *phoU1*. Overnight cultures of  
49 *Staphylococcus* strains were diluted 1:200 into 10 ml TSB containing 250ng/ml  
50 anhydrotetracycline and incubated with shaking at 220 rpm. Bacterial growth was  
51 monitored by measuring the OD<sub>600</sub> for 12 h. (B) Biofilm formation by AS-*phoU2* /  
52  $\Delta$ *phoU1* on microtiter plates. Overnight culture of the *S. epidermidis* strains were  
53 diluted 1:200 with fresh TSB (containing 250ng/ml anhydrotetracycline), added to 96-  
54 well polystyrene plates in triplicate and cultured under static conditions for 6 h. After  
55 washing, the biofilms were stained with crystal violet. The plates were analyzed at  
56 OD<sub>570</sub>. The experiments were repeated three times, and the data represent means $\pm$ SD.  
57 \*, P<0.05.

58
